# Supplementary material for: Soluble vascular endothelial growth factor receptor-1 contributes to the corneal antiangiogenic barrier
Source: HighWire-hosted journal article supplement (doi:10.1136/bjo.2006.107417), 2006-12-06
Supplement: 914505erratumfig4.pdf [file 914505erratumfig4.pdf]

Corrected Figure 8. Western blot showing comparison of VEGF levels in normal vs. neovascularized cornea. Lane 1 - Western blot of VEGF after immunoprecipitation of normal human corneal lysate for sFlt shows considerable binding of VEGF. Lane 2 - neovascularized human cornea (patient with ocular cicatricial pemphigoid), there is less VEGF binding.

1

2

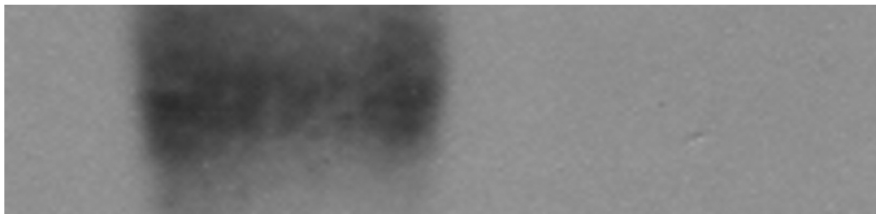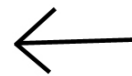

46 kD
